# Supplementary material for: Hypothalamic pregnenolone mediates recognition memory in the context of metabolic disorders
Source: PubMed Central journal article supplement — Cell Metab. 2022 Feb 1;34(2):269–284.e9. doi: 10.1016/j.cmet.2021.12.023 (PMC8815774; doi:10.1016/j.cmet.2021.12.023), 2022-02-01
Supplement: mmc1.pdf [file mmc1.pdf]

## Supplemental information

### Hypothalamic pregnenolone mediates recognition

#### memory in the context of metabolic disorders

Sara Ramírez, Roberta Haddad-Tóvulli, Marija Radosevic, Miriam Toledo, Adriana Pané, Daniel Alcolea, Vicent Ribas, Maria Milà-Guasch, Macarena Pozo, Arnaud Obri, Elena Eyre, Alicia G. Gómez-Valadés, Iñigo Chivite, Tomas Van Eeckhout, Ioannis Zalachoras, Jordi Altirriba, Corinna Bauder, Mónica Imbernón, Gloria Garrabou, Carmen Garcia-Ruiz, Rubén Nogueiras, David Soto, Xavier Gasull, Carmen Sandi, Jens C. Brüning, Juan Fortea, Amanda Jiménez, José C. Fernández-Checa, and Marc Claret

Figure S1

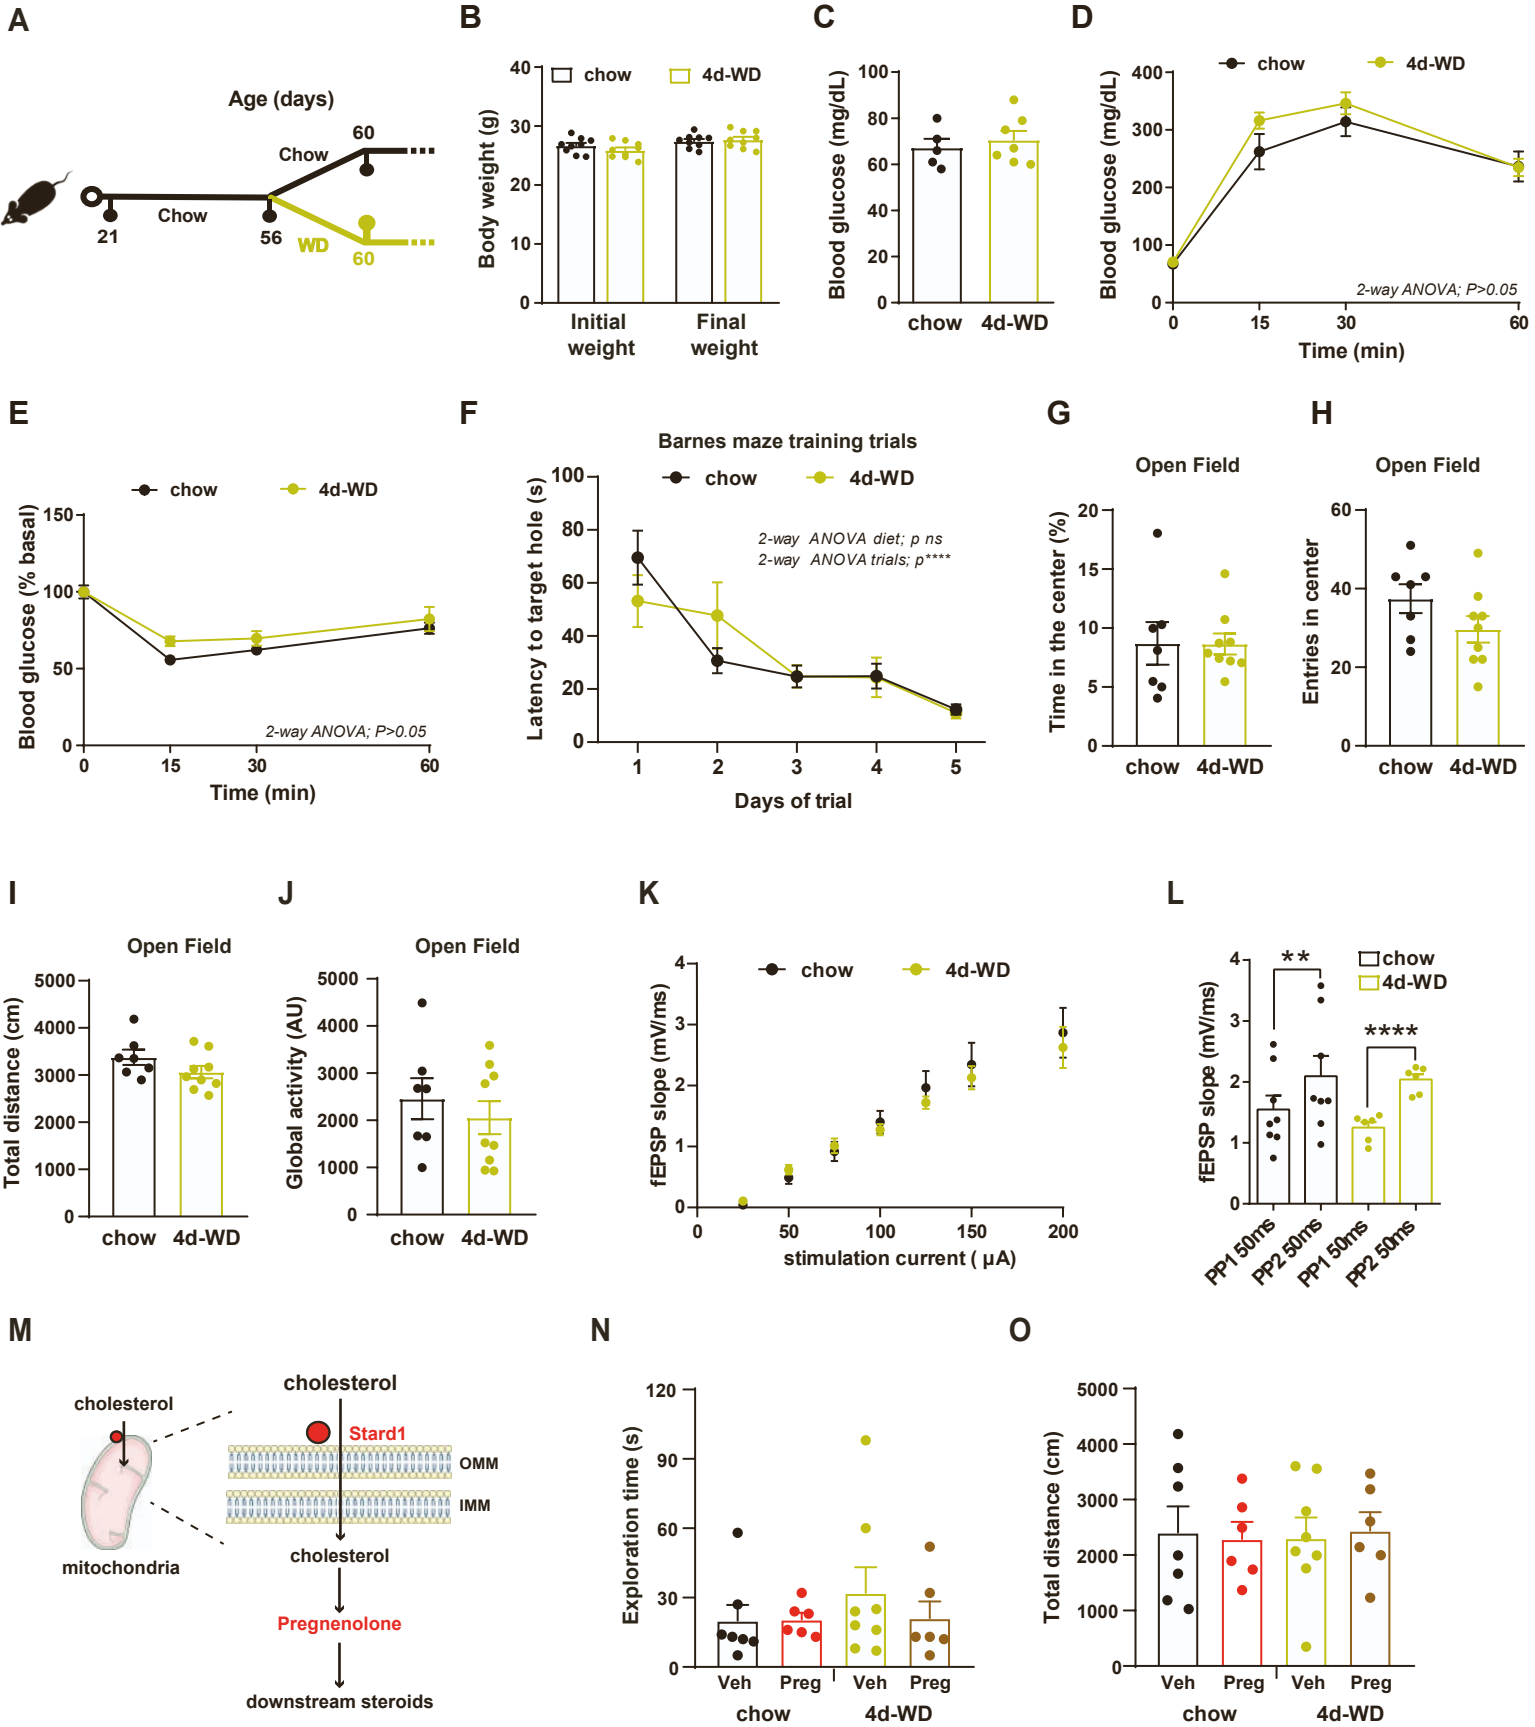

**Figure S1. Short-term western-diet feeding impairs cognitive function in the absence of metabolic alterations (Related to Figure 1).**

(A) Schematic illustration of the experimental strategy. C57Bl/6J mice at 56 days of age were submitted to either chow or western-diet for 4 consecutive days (4d-WD).

(B) Body weight at 56 days of age (initial weight) and after 4 days of western-diet (60 days of age; final weight) (n=9/diet).

(C) Basal blood glucose concentration in C57Bl/6J mice fed with either chow or western diet for 4 days (4d-WD) (n=5-7/diet).

(D) Glucose tolerance test in C57Bl/6J mice fed with either chow or western-diet for 4 days (4d-WD) (n=5-7/diet).

(E) Insulin sensitivity test in C57Bl/6J mice fed with either chow or western-diet for 4 days (4d-WD) (n=5-7/diet).

(F) Task learning curve for the latency to reach the scape hole during the training phase of the Barnes maze test (BMT) of chow and 4d-WD mice. Results show the average of 2 trials per day during 5 consecutive days (n=11/diet).

(G-J) Recorded parameters to assess open field performance in mice fed with either chow or 4d-WD: (G) time spent in the center; (H) number of entries in the center; (I) total distance travelled; (J) global activity (n=7-9/diet).

(K) Input/output characteristics of CA3-CA1 synapses in chow (n=7 recordings from 4 animals) and 4d-WD mice (n=7 recordings from 4 animals).

(L) Short-term plasticity at the Schaffer collateral - CA1 synapses showed paired-pulse facilitation (PPF) as measured by mean slope values of the fEPSPs in the response to the first (PP1) and second (PP2) stimulus. Both experimental groups showed a significant increase in the fEPSP slope upon second stimulus. Chow: n=7 recordings from 4 animals; 4d-WD: n=8 recordings from 4 animals. Interstimulus interval shown is 50 ms.

(M) Schematic illustration of pregnenolone biosynthesis, Stard1 location and function.

(N-O) Recorded parameters to assess NORT performance in C57Bl/6J mice fed with either chow or 4d-WD after central administration of vehicle or pregnenolone during the test phase: (N) exploration time (time exploring novel object + time exploring familiar object) and (O) total distance travelled (n=6-8/diet).

All studies were performed in male mice at 8-9 weeks of age. Dots in panels represent individual samples. Data are presented as mean  $\pm$  SEM. \*\*P<0.01; \*\*\*\*P<0.0001; ns: not significant.

**Figure S2**

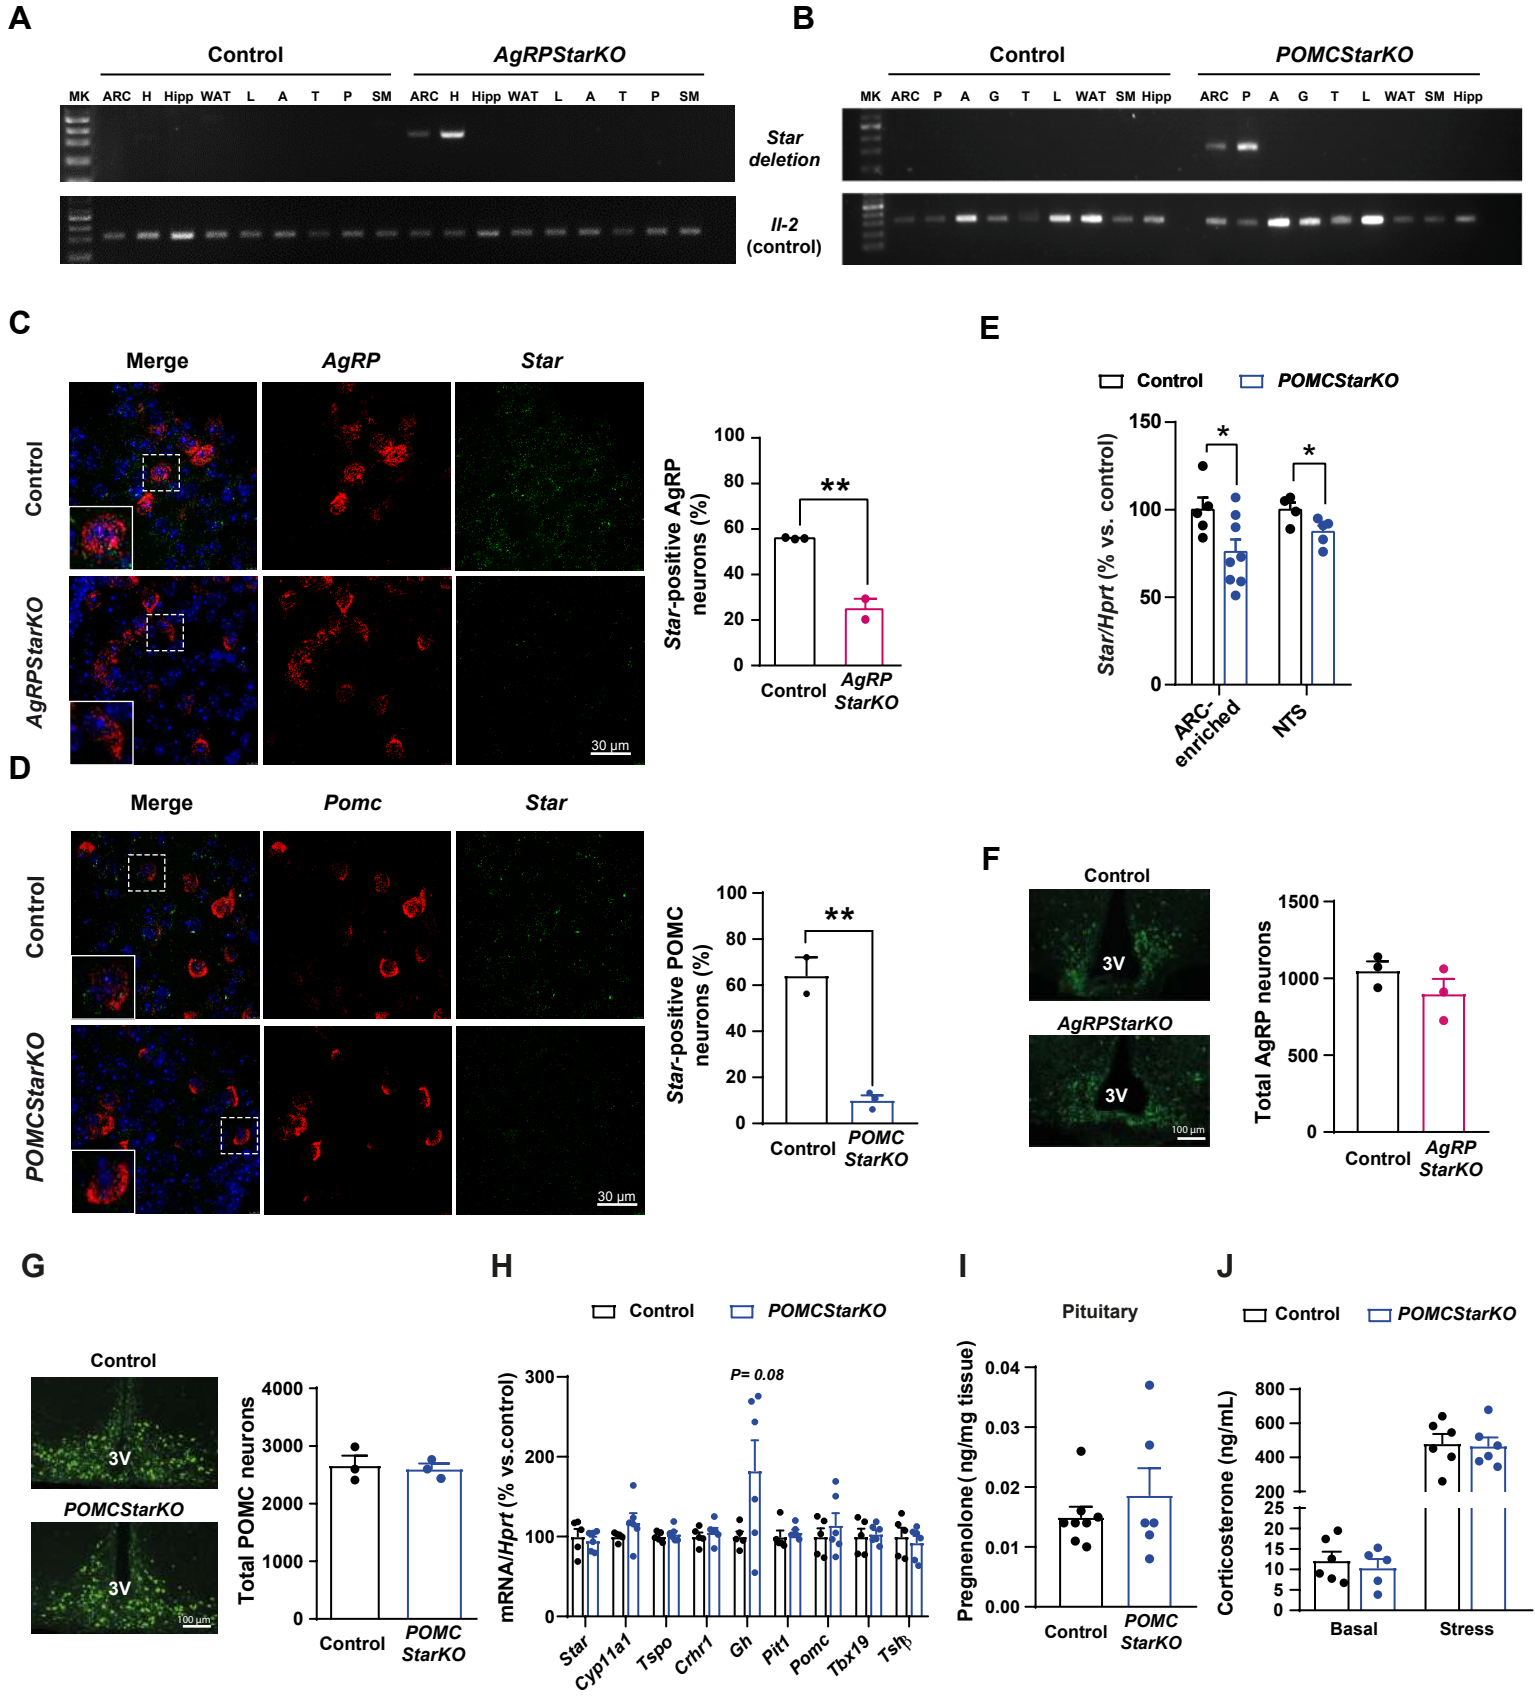

**Figure S2. Validation of mouse models with deletion of *Star* in AgRP or POMC neurons (Related to Figure 2).**

(A-B) Detection of recombination of the floxed allele by PCR in diverse tissue samples from (A) *AgRPStarKO* and (B) *POMCStarKO* mice. A PCR reaction with interleukin 2 (Il-2) as internal control is also shown. MK: DNA size marker; ARC: arcuate-enriched hypothalamus; H: mediobasal hypothalamus; Hipp: hippocampus; WAT: white adipose tissue; L: liver; A: adrenal gland; T: tail; P: pituitary; SM: skeletal muscle; G: gonad.

(C-D) Representative confocal images of fluorescent in situ hybridization colocalization of *Star* (green) with (C) *Agrp* (red) or (D) *Pomc* (red) in the arcuate nucleus of the hypothalamus from *AgRPStarKO* and *POMCStarKO* mice, respectively. Nuclear counterstaining was performed with DAPI (blue). Quantification is shown (n=2-3/genotype). Scale bar: 30  $\mu$ m.

(E) *Star* expression analysis in the arcuate-enriched mediobasal hypothalamus and in the nucleus of the solitary tract (NTS) from control and *POMCStarKO* mice. *Hprt* was used as housekeeping gene (n=4-8/genotype).

(F-G) AgRP and POMC neuronal population size in the arcuate nucleus of the hypothalamus from (F) *AgRPStarKO* (n=3/genotype) and (G) *POMCStarKO* mice (n=3/genotype). Scale bar: 100  $\mu$ m.

(H) Gene expression analysis in the pituitary from control and *POMCStarKO* mice. *Hprt* was used as housekeeping gene (n=5-6/genotype).

(I) Pregnenolone content in the pituitary from control and *POMCStarKO* mice (n=6-8/genotype).

(J) Basal and stressed corticosterone concentration in plasma from control and *POMCStarKO* mice (n=5-6/genotype).

All studies were performed in male mice between 10-16 weeks of age. Dots in panels represent individual samples. Data are presented as mean  $\pm$  SEM. \*P<0.05; \*\*P<0.01.

**Figure S3**

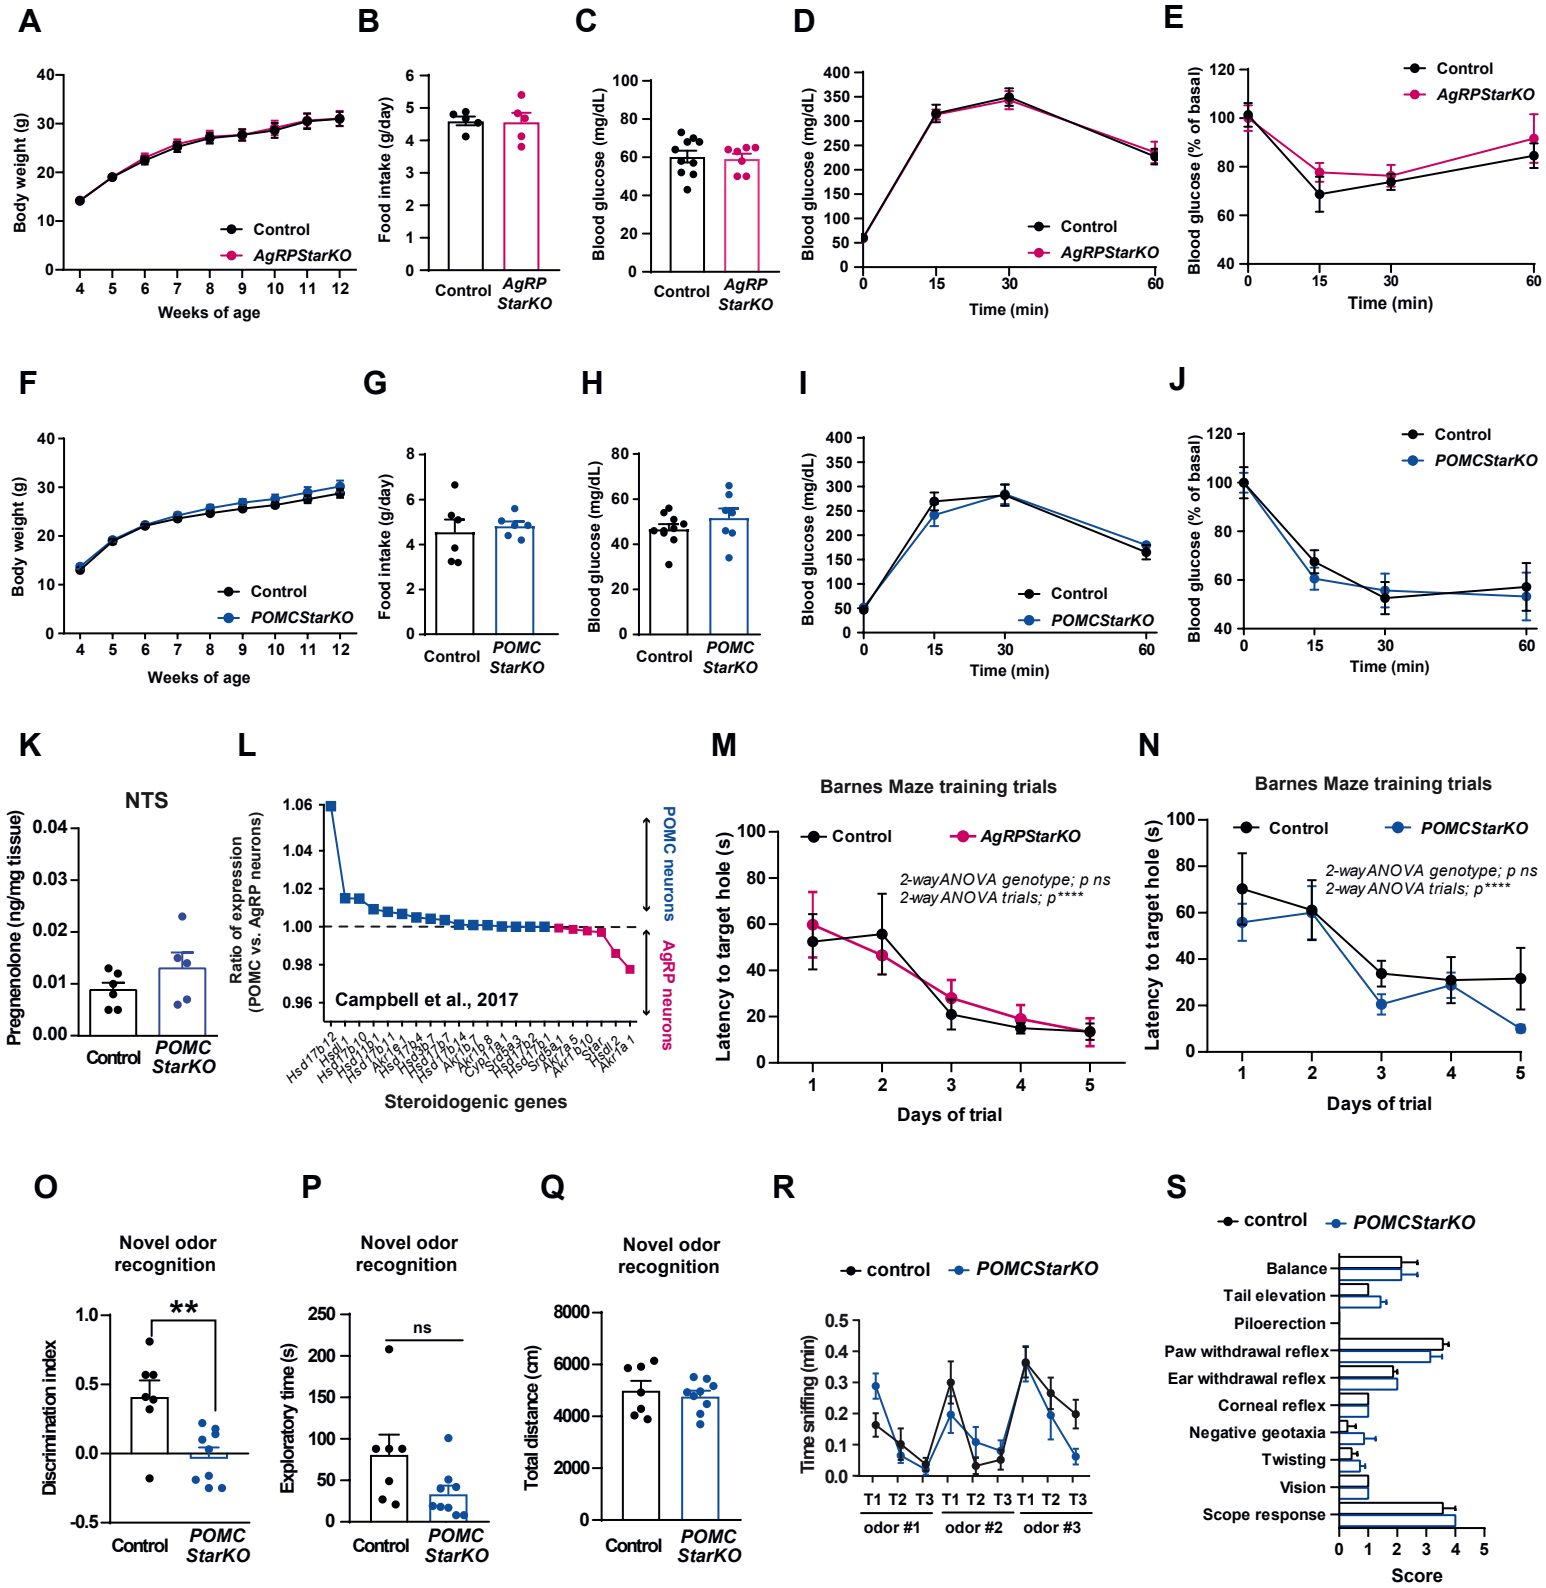

**Figure S3. Metabolic phenotyping of mouse models with deletion of *Star* in AgRP or POMC neurons (Related to Figure 2).**

(A-E) Assessment of metabolic parameters in control and *AgRPStarKO* mice: (A) body weight profile (n=7-10/genotype); (B) daily food intake (n=5/genotype); (C) basal blood glucose (n=7-10/genotype); (D) glucose tolerance test (n=7-10/genotype); (E) insulin sensitivity test (n=7-10/genotype).

(F-J) Assessment of metabolic parameters in control and *POMCStarKO* mice: (F) body weight profile (n=18/genotype); (G) daily food intake (n=6/genotype); (H) basal blood glucose (n=7-10/genotype); (I) glucose tolerance test (n=7-10/genotype); (J) insulin sensitivity test (n=7-8/genotype).

(K) Pregnenolone content in the nucleus of the solitary tract (NTS) from control and *POMCStarKO* mice (n=6/genotype).

(L) Comparative analysis of the expression of neurosteroidogenic genes between AgRP and POMC neurons. Single-cell sequencing data was obtained from Campbell et al. 2017. Data is expressed as gene expression ratio.

(M-N) Task learning curve for the latency to reach the scape hole during the training phase of the Barnes maze test (BMT) in (M) *AgRPStarKO* (n=8/genotype) and (N) *POMCStarKO* mice (n=9-10/genotype). Results show the average of 2 trials per day during 5 consecutive days.

(O-Q) Recorded parameters to assess novel odor recognition test performance in *POMCStarKO* mice during the test phase: (O) discrimination index (time exploring novel object – time exploring familiar object) / (time exploring novel object + time exploring familiar object); (P) exploration time (time exploring novel object + time exploring familiar object); (Q) total distance travelled (n=7-9/genotype).

(R) Assessment of the smelling capacity of control and *POMCStarKO* mice to diverse social and non-social odors through trials (T1-T3) (n=6/genotype).

(S) Assessment of various neurosensory parameters in control and *POMCStarKO* mice (n=7/genotype).

All studies were performed in male mice between 10-16 weeks of age. Dots in panels represent individual samples. Data are presented as mean  $\pm$  SEM. \*\*P<0.01; \*\*\*\*P<0.0001; ns: not significant.

Figure S4

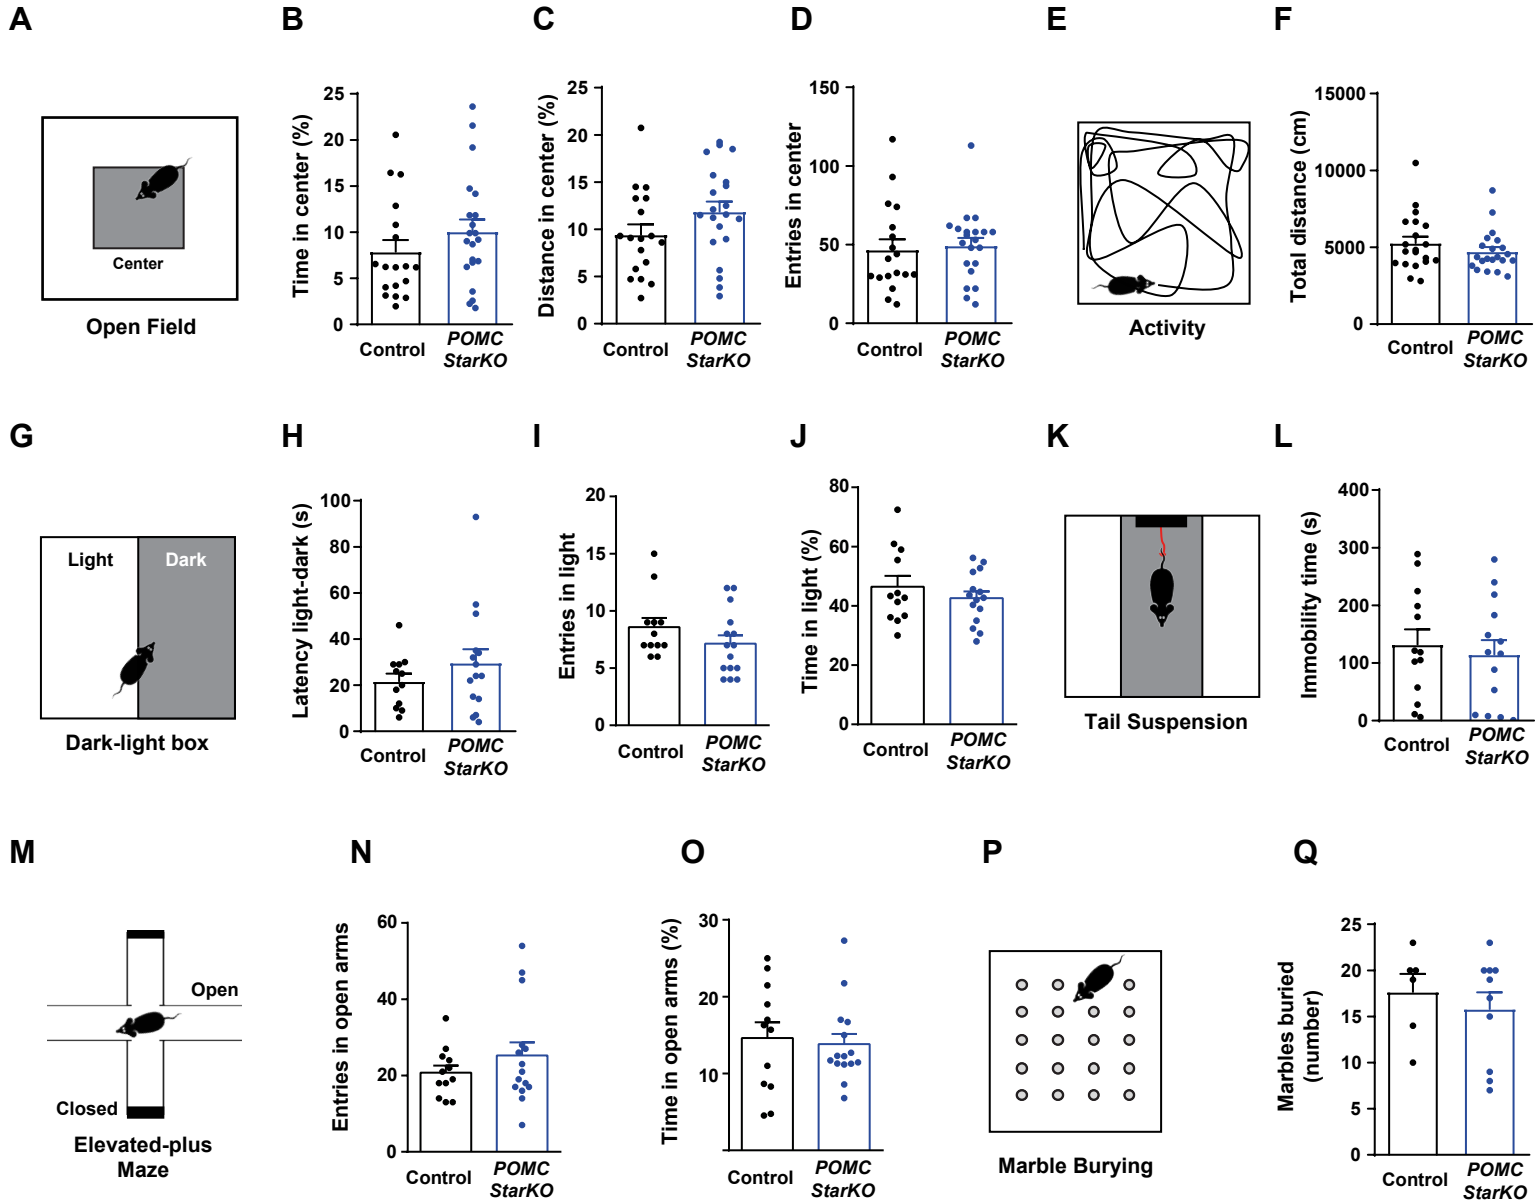



**Figure S4. Behavioral phenotyping of mice with deletion of *Star* in POMC neurons (Related to Figure 2).**

(A) Schematic illustration of the open field task.

(B-D) Recorded parameters to assess open field performance in control and *POMCStarKO* mice: (B) time spent in the center; (C) distance travelled in the center; (D) number of entries in the center (n=18-21/genotype).

(E-F) Schematic illustration of the activity assessment task and (F) total distance travelled of control and *POMCStarKO* mice (n=20-21/genotype).

(G) Schematic illustration of the dark-light box task.

(H-J) Recorded parameters to assess performance during the dark-light box paradigm in control and *POMCStarKO* mice: (H) latency light-dark transition; (I) number of entries in illuminated zone; (J) time spent in the illuminated zone (n=12-15/genotype).

(K) Schematic illustration of the tail suspension test.

(L) Immobility time of control and *POMCStarKO* mice in a tail suspension test (n=13-14/genotype).

(M) Schematic illustration of the elevated-plus maze task.

(N-O) Recorded parameters to assess performance during the elevated-plus maze paradigm in control and *POMCStarKO* mice: (N) number of entries in open arms; (O) time spent in open arms (n=12-15/genotype).

(P) Schematic illustration of the marble burying test.

(Q) Number of marbles buried by control and *POMCStarKO* mice (n=6-10/genotype).

All studies were performed in male mice between 10-16 weeks of age. Dots in panels represent individual samples. Data are presented as mean  $\pm$  SEM.

**Figure S5**

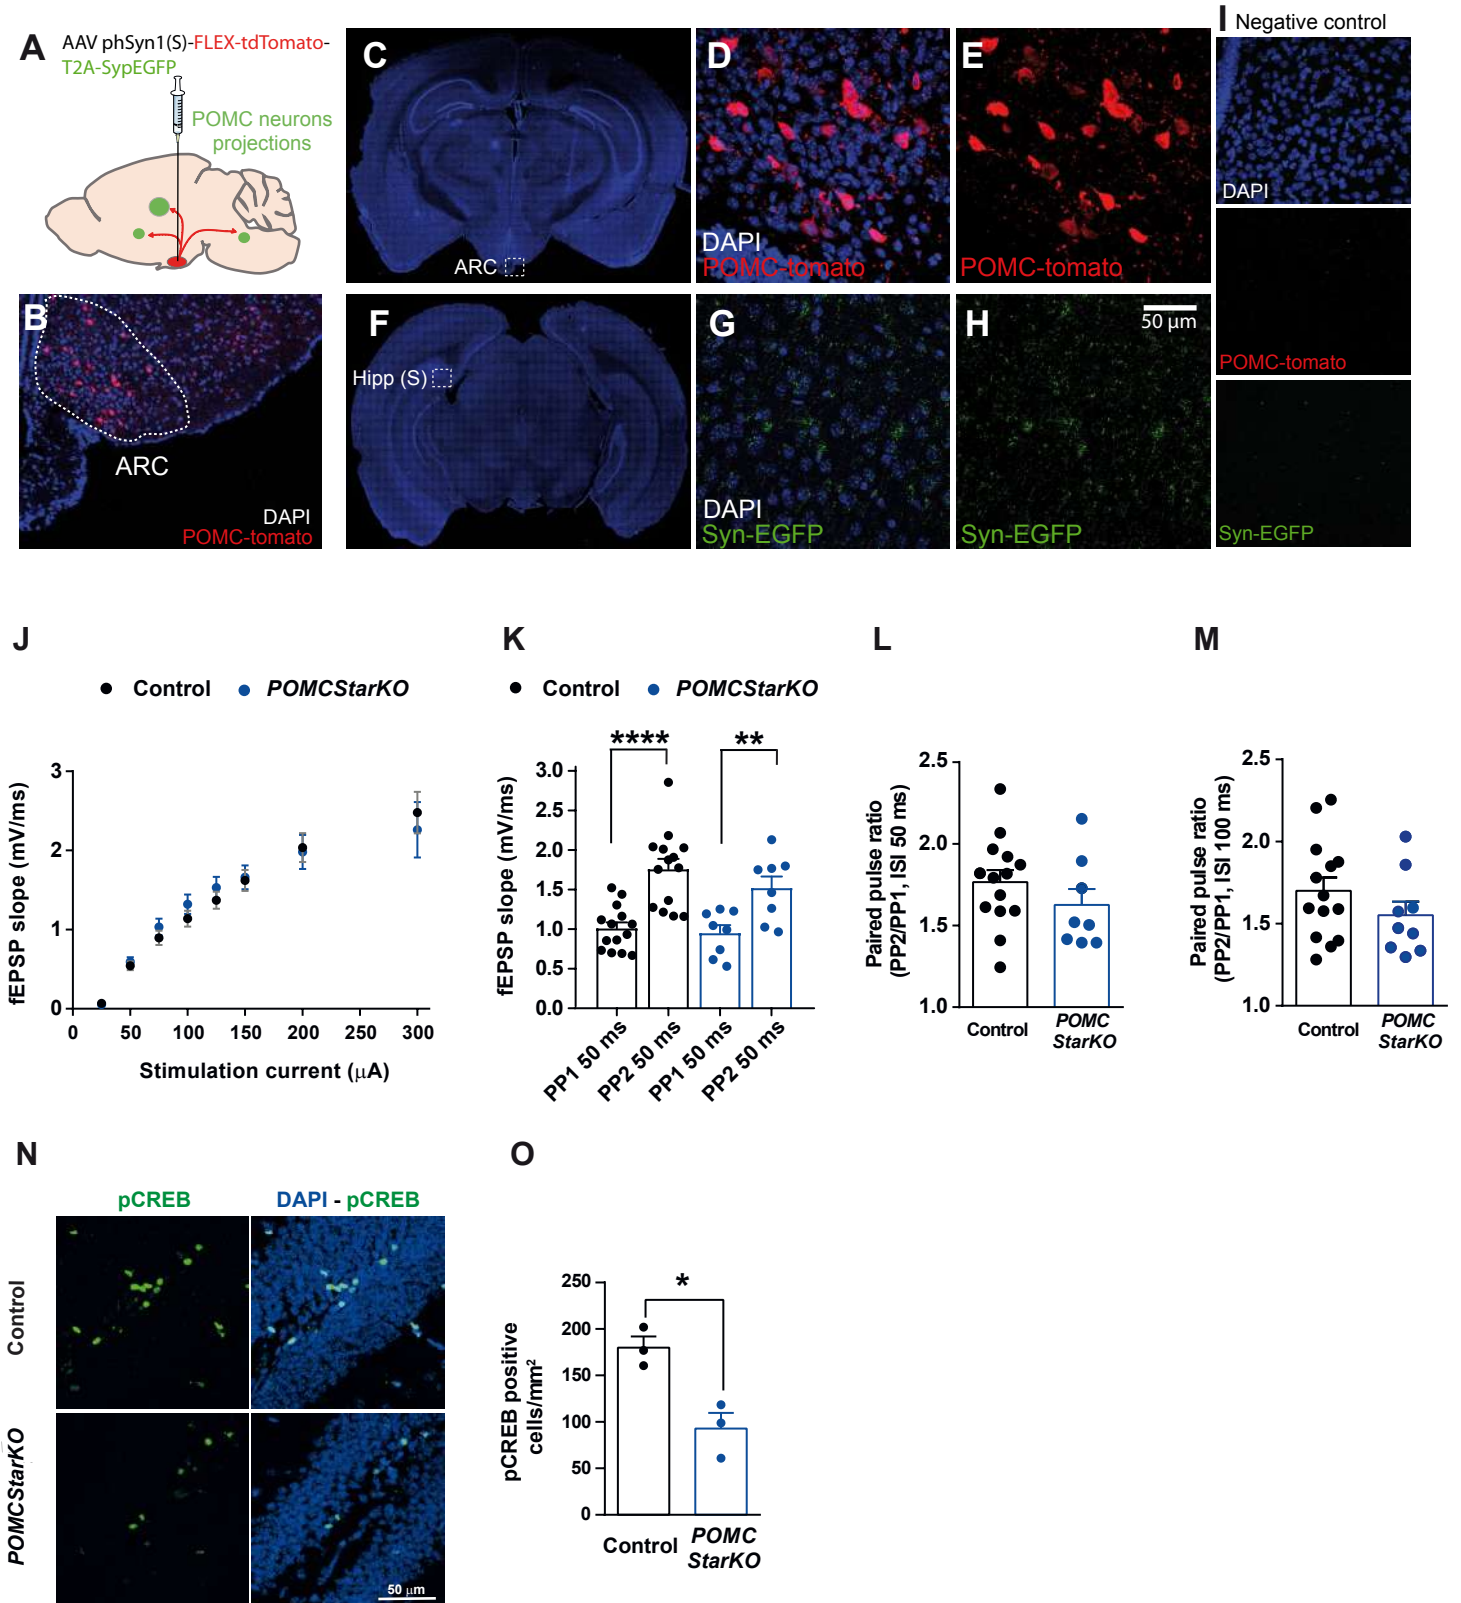

**Figure S5. Arcuate POMC neuron projections to hippocampal subiculum and long-term potentiation parameters (Related to Figure 2).**

(A) Schematic depicting viral injection of *Cre*-dependent AAV-phSyn1(S)-FLEX-TdTomato-T2A-SypEGFP into the arcuate nucleus of the hypothalamus (ARC) of *POMC<sup>Cre/+</sup>* mice.

(B) Representative image of brain sections showing TdTomato expression (staining POMC neurons) in the ARC.

(C) Representative confocal images of a coronal section of the brain. Dotted inset depicts the ARC nucleus.

(D-E) TdTomato expression in the dotted area (ARC).

(F) Representative image of a coronal section of the brain. Dotted inset depicts the hippocampal subiculum area (Hipp (S)).

(G-H) EGFP expression (staining synaptophysin) in the hippocampal subiculum.

(I) Negative controls without primary antibody.

Scale bar: 50  $\mu$ m.

(J) Input/output characteristics of CA3-CA1 synapses in control (n=14 recordings from 9 animals) and *POMCStarKO* mice (n=9 recordings from 5 animals).

(K) Short-term plasticity at the Schaffer collateral - CA1 synapses showed paired-pulse facilitation (PPF) as measured by mean slope values of the fEPSPs in the response to the first (PP1) and second (PP2) stimulus. Both experimental groups showed a significant increase in the fEPSP slope upon second stimulus. Controls: n=14 recordings from 9 animals; *POMCStarKO*: n=8 recordings from 5 animals. Interstimulus interval shown is 50 ms.

(L-M) Paired pulse facilitation, calculated as P2/P1 (pulse 2/pulse 1) fEPSP slope ratio, with interstimulus interval (ISI) of either 50 ms (L) or 100 ms (M).

(N) Representative confocal images of pCREB staining (green fluorescence) in the dentate gyrus of control and *POMCStarKO* mice under random-fed conditions. Scale bar: 50  $\mu$ m.

(O) Quantification of pCREB positive cells (n=3/genotype).

All studies were performed in male mice between 10-16 weeks of age. Dots in panels represent individual samples. Data are presented as mean  $\pm$  SEM. \*P<0.05; \*\*P<0.01; \*\*\*\*P<0.0001.

**Figure S6**

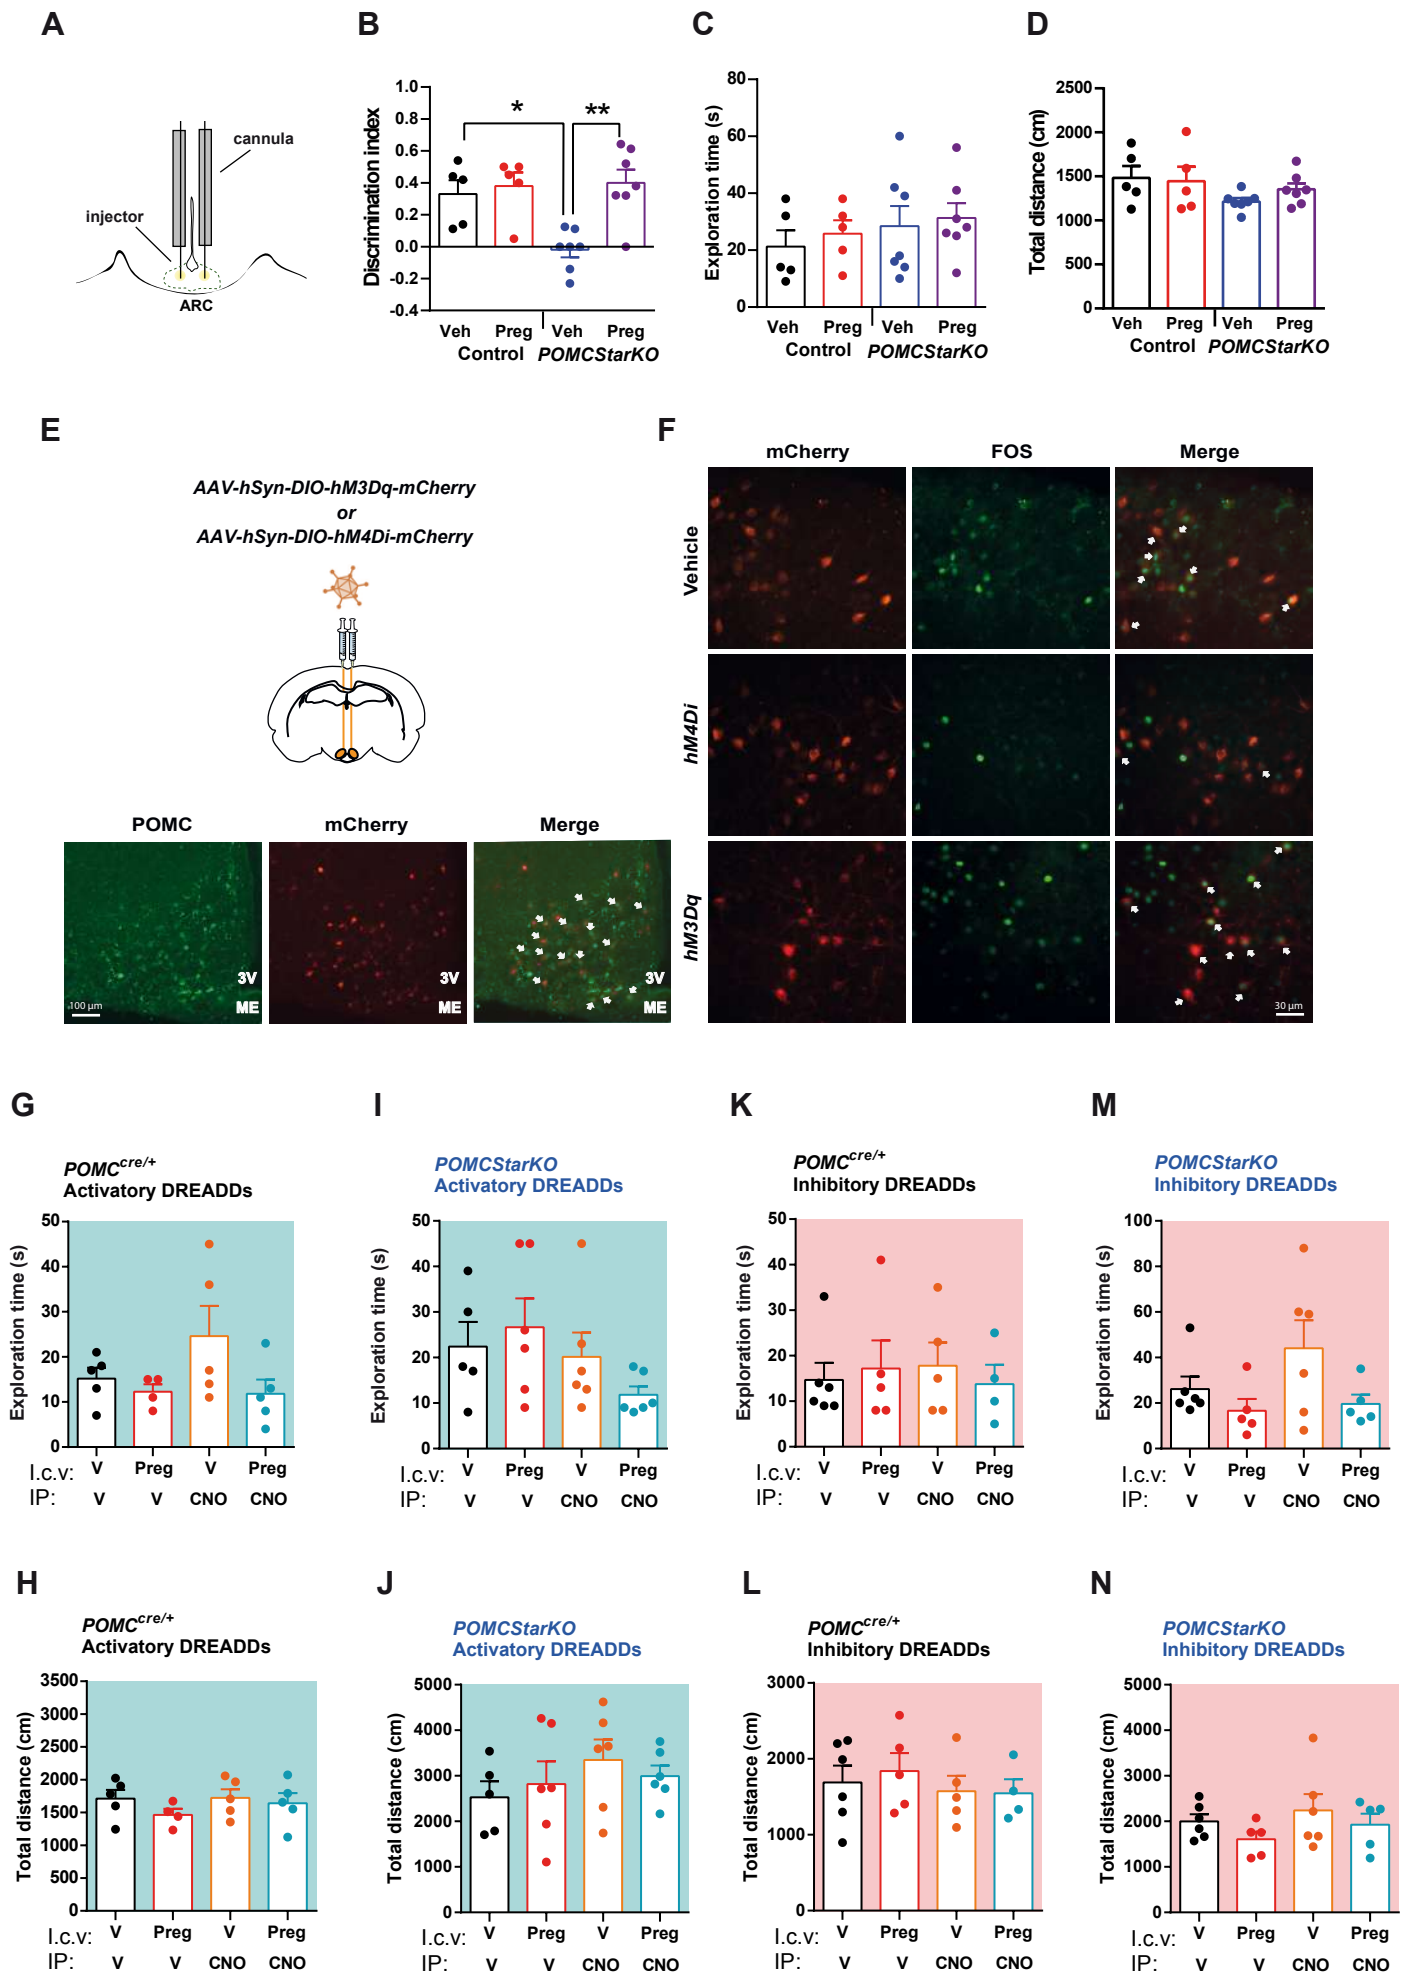

**Figure S6. Validation of pregnenolone-arcuate effects and DREADD strategy (Related to Figure 4).**

(A) Scheme illustrating bilateral cannulation into the arcuate nucleus of the hypothalamus (ARC).

(B-D) Recorded parameters to assess NORT performance in control and *POMCStarKO* mice, after central vehicle or pregnenolone administration, during the test phase: (B) discrimination index (time exploring novel object – time exploring familiar object) / (time exploring novel object + time exploring familiar object); (C) exploratory time (time exploring novel object + time exploring familiar object); (D) total distance travelled (n=5-7/genotype).

(E) Schematic illustration of the DREADD strategy used. Representative images of POMC and mCherry immunostaining of *POMC<sup>Cre/+</sup>* mice injected bilaterally, in the arcuate nucleus of the hypothalamus, with AAV-hSyn-DIO-hM3Dq-mCherry are shown. White arrows indicate colocalization. 3V: third ventricle; ME: median eminence. Scale bar: 100  $\mu$ m.

(F) Representative images of FOS and mCherry immunostaining of *POMC<sup>Cre/+</sup>* mice, injected bilaterally in the arcuate nucleus of the hypothalamus, with AAV-hSyn-DIO-hM3Dq-mCherry or AAV-hSyn-DIO-hM4Di-mCherry. White arrows indicate colocalization. Scale bar: 30  $\mu$ m.

(G-J) Recorded parameters to assess NORT performance in *POMC<sup>Cre/+</sup>* and *POMCStarKO* mice after POMC neuronal activation and central vehicle (V) or pregnenolone (Preg) administration during the test phase: (G) exploration time and (H) total distance travelled of *POMC<sup>Cre/+</sup>* mice (n=4-5/genotype); (I) exploration time and (J) total distance travelled of *POMCStarKO* mice (n=5-6/genotype).

(K-N) Recorded parameters to assess NORT performance in *POMC<sup>Cre/+</sup>* and *POMCStarKO* mice after POMC neuronal inhibition and central vehicle (V) or pregnenolone (Preg) administration during the test phase: (K) exploration time and (L) total distance travelled of *POMC<sup>Cre/+</sup>* mice (n=4-6/genotype); (M) exploration time and (N) total distance of *POMCStarKO* mice (n=5-6/genotype).

All studies were performed in male mice at 10 weeks of age. Dots in panels represent individual samples. Data is presented as mean  $\pm$  SEM. \*P<0.05; \*\*P<0.001.

**Table S1. Related to Figure 6. Anthropometric, clinical and cognitive features of the human cohort.** MHO: Metabolically healthy obese (n=14); MUO: Metabolically unhealthy obese (n=26); M: male; F: female; BMI: body mass index; SBP: systolic blood pressure; DBP: diastolic blood pressure; HOMA-IR: homeostatic model assessment-insulin resistance; HbA1c: glycated hemoglobin; LDL: low-density lipoprotein; HDL: high-density lipoprotein; DM2: type-2 diabetes; MMSE: mini-mental state examination; CSF: cerebrospinal fluid. Data are shown as mean  $\pm$  SEM.

| <b>Parameter</b>                  | <b>MHO patients</b> | <b>MUO patients</b> | <b>P value</b> |
|-----------------------------------|---------------------|---------------------|----------------|
| <b>N</b>                          | 14                  | 26                  | -              |
| <b>M/F</b>                        | 7/7                 | 11/15               | -              |
| <b>Age (years)</b>                | 49 $\pm$ 2          | 53 $\pm$ 1          | 0.11           |
| <b>BMI (Kg/m<sup>2</sup>)</b>     | 44 $\pm$ 1          | 43 $\pm$ 1          | 0.66           |
| <b>SBP (mmHg)</b>                 | 128 $\pm$ 3         | 131 $\pm$ 3         | 0.54           |
| <b>DBP (mmHg)</b>                 | 82 $\pm$ 3          | 81 $\pm$ 2          | 0.63           |
| <b>Fasting glycemia (mg/dL)</b>   | 92 $\pm$ 2          | 117 $\pm$ 7         | 0.009          |
| <b>HOMA-IR</b>                    | 4 $\pm$ 1           | 10 $\pm$ 2          | 0.024          |
| <b>HbA1c (%)</b>                  | 5.4 $\pm$ 0.1       | 6.4 $\pm$ 0.2       | 0.0004         |
| <b>Triglycerides (mg/dL)</b>      | 98 $\pm$ 10         | 149 $\pm$ 18        | 0.052          |
| <b>Cholesterol (mg/dL)</b>        | 199 $\pm$ 9         | 182 $\pm$ 7         | 0.16           |
| <b>LDL (mg/dL)</b>                | 120 $\pm$ 6         | 107 $\pm$ 5         | 0.13           |
| <b>HDL (mg/dL)</b>                | 56 $\pm$ 3          | 46 $\pm$ 2          | 0.007          |
| <b>DM2 treatment (%)</b>          | 0                   | 69                  | -              |
| <b>Hypertension treatment (%)</b> | 0                   | 69                  | -              |
| <b>Dyslipemia treatment (%)</b>   | 0                   | 31                  | -              |
| <b>MMSE score</b>                 | 29.3 $\pm$ 0.3      | 29.2 $\pm$ 0.1      | 0.74           |
| <b>Pregnenolone CSF (ng/ml)</b>   | 0.60 $\pm$ 0.06     | 0.54 $\pm$ 0.05     | 0.51           |
